# Supplementary material
Source: publisher figshare collection journal article supplement (https://acs.figshare.com/ndownloader/files/26750581)
Supplement: Supplementary file 1 [file 26750581]

# Halide Effects in BiVO<sub>4</sub>/BiOX Heterostructures Decorated with Pd Nanoparticles for Photocatalytic Degradation of Rhodamine B as a Model Organic Pollutant

Mary O. Olagunju,<sup>1</sup> Elsayed M. Zahran,<sup>2</sup> Jacqueline M. Reed,<sup>1</sup> Elnaz Zeynaloo,<sup>1</sup> Dharmendra Shukla,<sup>3</sup> Joshua L. Cohn,<sup>3</sup> Bapurao Surnar,<sup>4</sup> Shanta Dhar,<sup>4</sup> Leonidas G. Bachas,<sup>1,5</sup> and Marc R. Knecht<sup>1,5,\*</sup>

1. Department of Chemistry, University of Miami, 1301 Memorial Drive, Coral Gables, Florida 33146, United States

2. Department of Chemistry, Ball State University, Muncie, Indiana 47306, United States

3. Department of Physics, University of Miami, 1320 Campo Sano Drive, Coral Gables, Florida 33146, United States

4. Department of Biochemistry and Molecular Biology, Sylvester Comprehensive Cancer Center, Leonard M. Miller School of Medicine, University of Miami, 1011 NW 15<sup>th</sup> St., Miami, Florida 33136, United States

5. Dr. J.T. Macdonald Foundation Biomedical Nanotechnology Institute, University of Miami, UM Life Science and Technology Building, 1951 NW 7<sup>th</sup> Ave, Suite 475, Miami, Florida 33136, United States

KEYWORDS: BiVO<sub>4</sub>, BiOCl, BiOI, BiOBr, halide effects, Pd, photocatalysis

\*To whom correspondence should be address: MRK – [knecht@miami.edu](mailto:knecht@miami.edu)

## SUPPORTING INFORMATION

| Material                             | Pd (wt %) |
|--------------------------------------|-----------|
| BiVO <sub>4</sub> /BiOCl/Pd          | 2.93      |
| Calcined BiVO <sub>4</sub> /BiOCl/Pd | 3.32      |
| BiVO <sub>4</sub> /BiOBr/Pd          | 1.73      |
| BiVO <sub>4</sub> /BiOI/Pd           | 2.95      |

**Figure S1.** Pd wt% on the indicated BiVO<sub>4</sub>/BiOX/Pd materials as determined by ICP-MS.

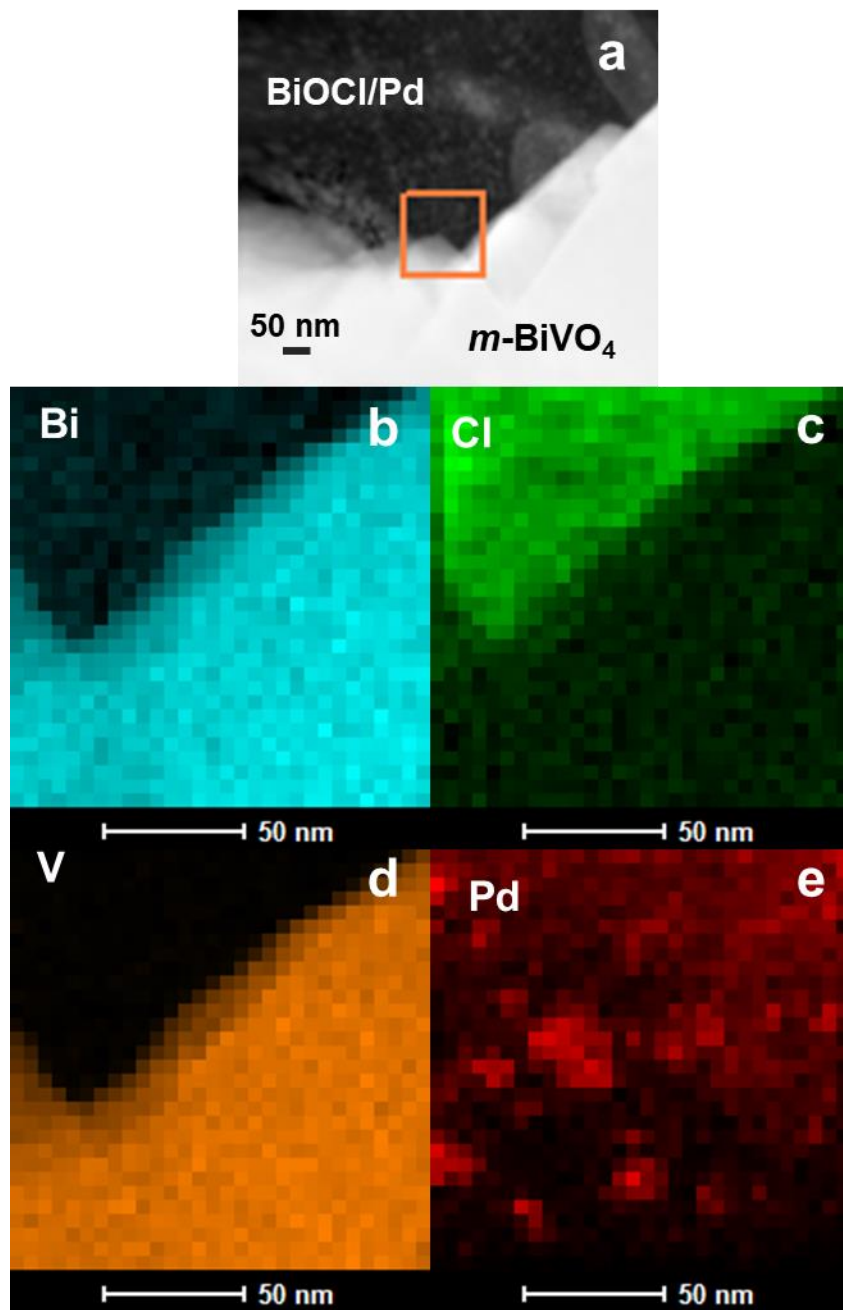

**Figure S2.** Dark-field STEM image and EDS elemental mapping of BiVO<sub>4</sub>/BiOCl/Pd

# SUPPORTING INFORMATION

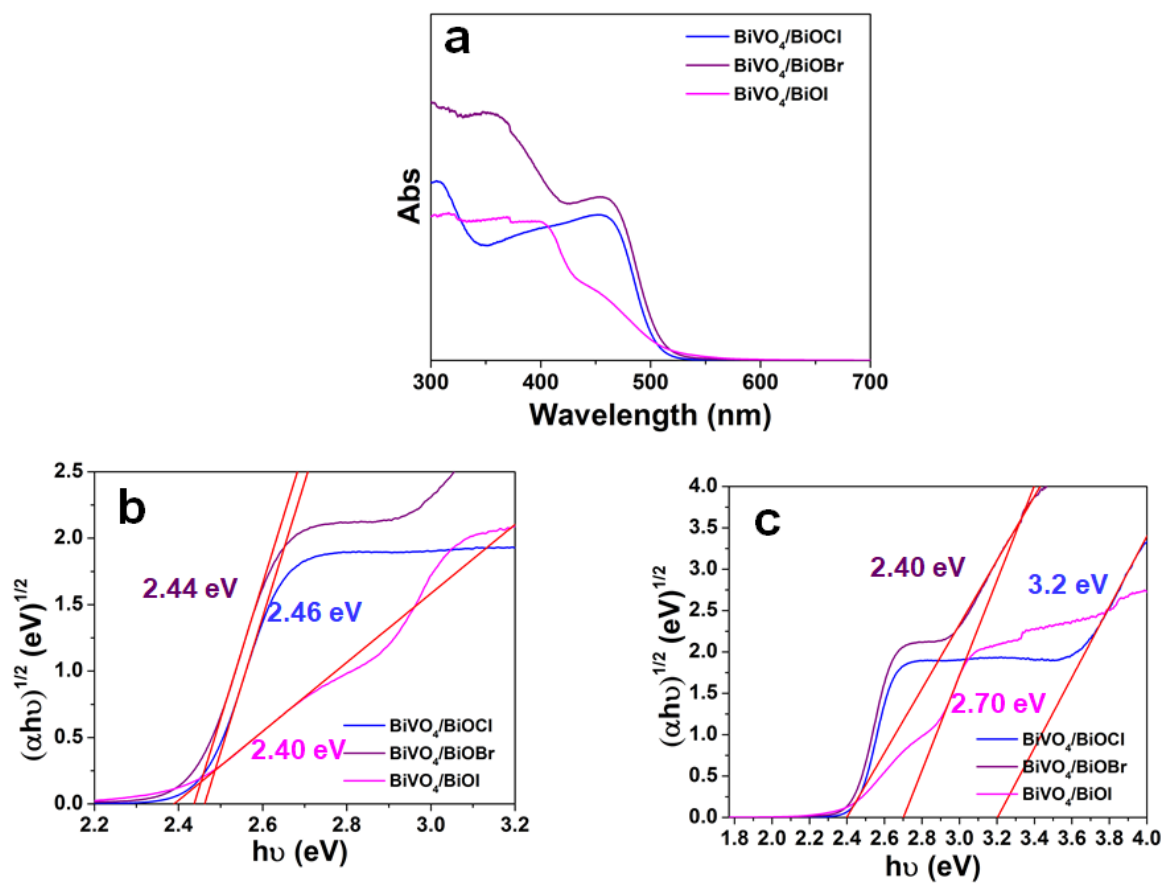

**Figure S3.** UV-vis DRS spectra of the BiVO<sub>4</sub>/BiOX materials (top) and Tauc plots (bottom) for the (b) BiVO<sub>4</sub> and (c) BiOX components.

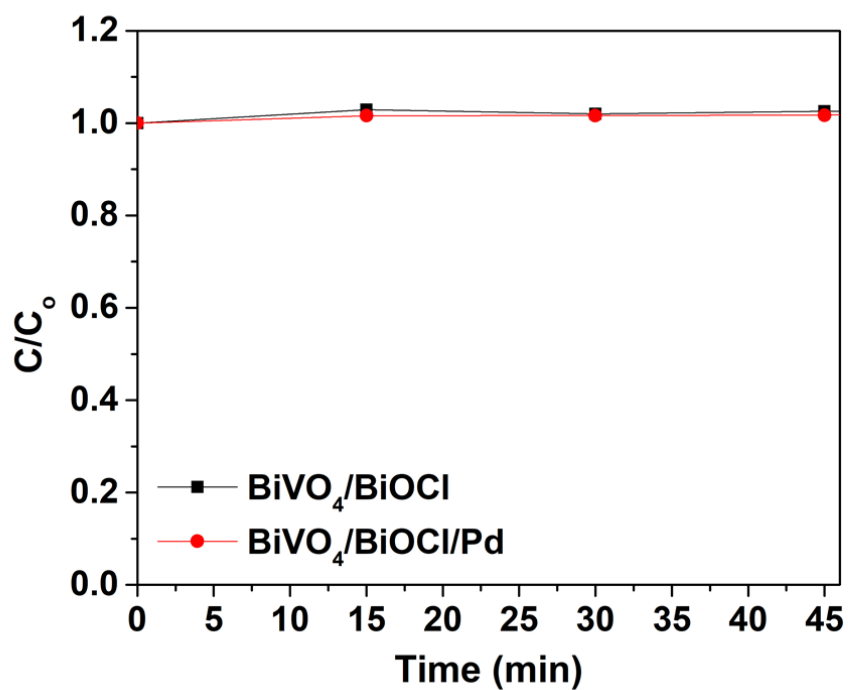

**Figure S4.** Measurements of RhB concentration changes in the dark prior to irradiation and reaction initiation using the  $\text{BiVO}_4/\text{BiOCl}$  and  $\text{BiVO}_4/\text{BiOCl}/\text{Pd}$  materials. No changes in concentration were evident after 45 min, indicating lack of adsorption of the dye on the materials.

## SUPPORTING INFORMATION

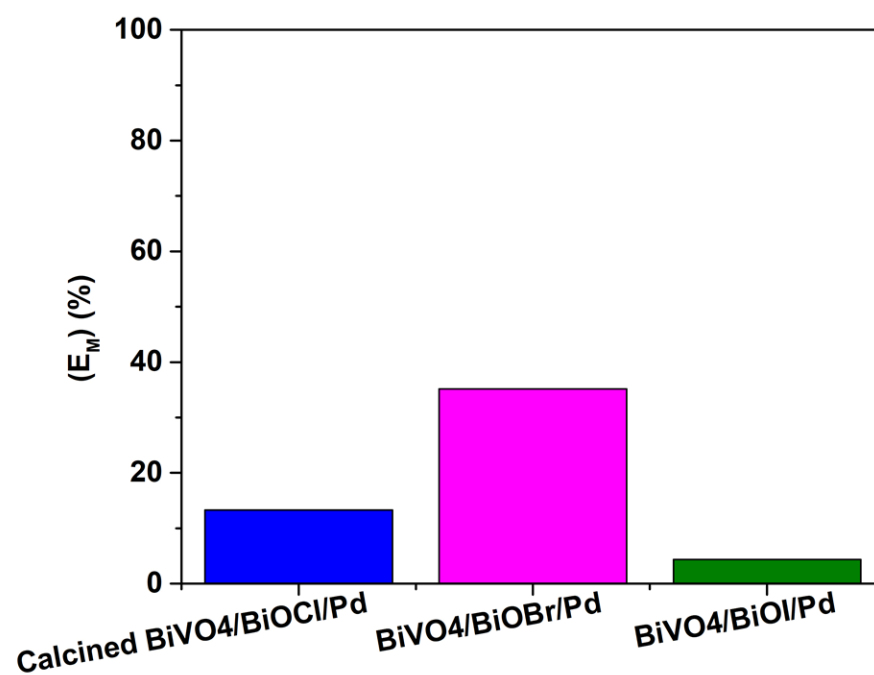

**Figure S5.** Total organic carbon mineralized using the indicated photocatalytic material where  $E_M$  represents the efficiency of RhB mineralization.

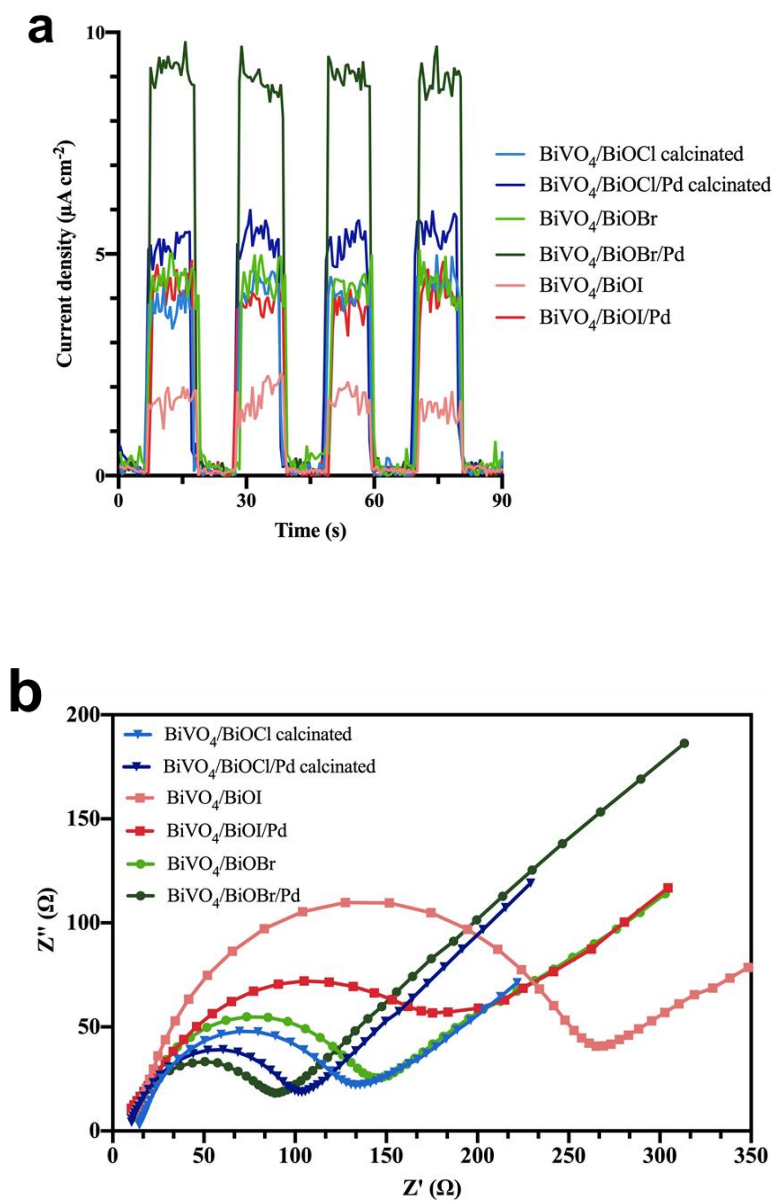

**Figure S6.** Part (a) presents the transient photocurrent spectra of the BiVO<sub>4</sub>/BiOX/Pd materials, while part (b) displays the EIS spectra of the indicated materials.

## SUPPORTING INFORMATION

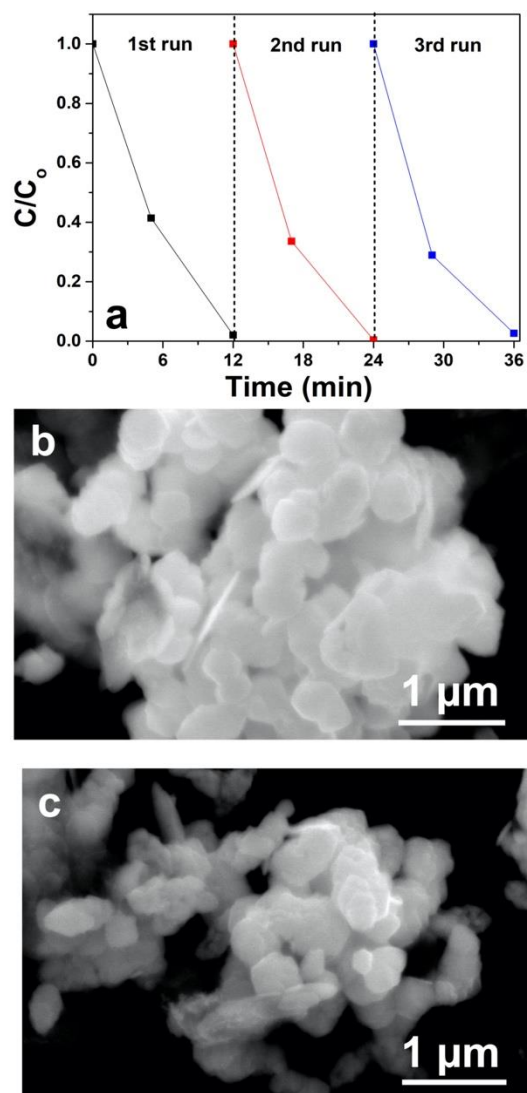

**Figure S7.** Catalytic recycling analysis for the degradation of RhB using the calcined  $\text{BiVO}_4/\text{BiOCl}/\text{Pd}$  photocatalyst. Part (a) presents the reactivity analysis over three catalytic cycles, while parts (b and c) display an SEM image of the materials (b) before and (c) after one catalytic cycle.
